# Supplementary material for: Anti-RA33 antibodies are present in a subset of patients with immune checkpoint inhibitor-induced inflammatory arthritis
Source: RMD Open. 2022 Sep 12;8(2):e002511. doi: 10.1136/rmdopen-2022-002511 (PMC9472204; doi:10.1136/rmdopen-2022-002511)
Supplement: Supplementary data [file rmdopen-2022-002511supp001.xlsx]

## Sheet: Plate 1
Plate 1
1	2	3	4	5	6	7	8	9	10	11	12
Dil	Dil	IM 1	IM 1	IM 9	IM 9	IM 25	IM 25	59	59	131	131
Cal 1	Cal 1	IM 2	IM 2	IM 10	IM 10	IM 27	IM 27	71	71	HC005	HC005
Cal 2	Cal 2	IM 3	IM 3	IM 11	IM 11	IM 29	IM 29	72	72	HC011	HC011
Cal 3	Cal 3	IM 4	IM 4	IM 12	IM 12	13	13	82	82	HC012	HC012
Cal 4	Cal 4	IM 5	IM 5	IM 13	IM 13	15	15	90	90	HC014	HC014
Cal 5	Cal 5	IM 6	IM 6	IM 19	IM 19	29	29	96	96	HC025	HC025
PC	PC	IM 7	IM 7	IM 23	IM 23	54	54	116	116	HC031	HC031
NC	NC	IM 8	IM 8	IM 24	IM 24	57	57	126	126	HC035	HC035
Absorbance @ 450 (0.1s) (A)
0.000
0.0568728	0.055609	1.26358	1.2022	0.225134	0.321059	2.03901	1.9179	0.235643	0.20615	0.335067	0.327782
0.665829	0.62468	0.213585	0.22164	0.326969	0.275501	0.185725	0.172894	0.133219	0.155739	0.43094	0.40241
1.11279	1.08805	0.485008	0.535	1.01794	0.984392	0.196908	0.222946	0.500848	0.52677	0.222052	0.215743
1.7505	1.65313	0.200983	0.263757	0.252575	0.289382	0.252946	0.244926	0.340783	0.470703	0.191228	0.164201
2.17422	2.12614	0.621145	0.484806	0.144787	0.166072	0.181913	0.150674	0.257173	0.318078	0.143039	0.139132
2.32613	2.32262	1.06789	0.999591	0.170782	0.211933	0.333573	0.316681	0.251362	0.224547	0.136044	0.107714
1.92514	1.93819	0.207944	0.19021	0.313379	0.29385	0.352774	0.337276	0.964274	1.3753	0.237467	0.231252
0.330381	0.348683	0.565775	0.422066	0.328528	0.232285	0.228153	0.265036	0.617763	0.525415	0.298536	0.357314
Absorbance @ 560 (0.1s) (A) - reference
0.000
0.0341393	0.0309762	0.0349686	0.042368	0.0374294	0.0362177	0.0465379	0.0460026	0.0345723	0.0329378	0.0383518	0.0388933
0.0354367	0.0342594	0.036413	0.0331105	0.0378966	0.0353836	0.0422306	0.0373635	0.0358965	0.0344668	0.0364846	0.0397443
0.0397467	0.0389808	0.0337349	0.0359621	0.0369538	0.0385029	0.0371802	0.0390934	0.0350223	0.0353092	0.0365651	0.0380113
0.0421106	0.0377564	0.0388957	0.0389201	0.034336	0.0374608	0.0344538	0.0379162	0.0331423	0.0361916	0.0331458	0.0378948
0.0453616	0.0429283	0.0385993	0.0375208	0.0341416	0.0371144	0.0366451	0.0369982	0.0337743	0.0378414	0.0351102	0.0379744
0.0453676	0.045457	0.042272	0.0437282	0.0329431	0.0489544	0.0364734	0.0381812	0.0347297	0.0349314	0.0330847	0.0338626
0.0434387	0.0423866	0.0371939	0.0336125	0.0356086	0.0316999	0.0370818	0.0379798	0.0458652	0.0376988	0.0361822	0.0410024
0.0377814	0.0360579	0.0366954	0.0394652	0.0415549	0.0328151	0.0378841	0.0392709	0.0370042	0.0354964	0.0321206	0.0383566
Adjused Absorbance (450-560nm)
0.0227335	0.0246328	1.22861	1.15983	0.187705	0.284841	1.99247	1.8719	0.20107	0.173212	0.296715	0.288888
0.630392	0.59042	0.177172	0.188529	0.289073	0.240117	0.143495	0.13553	0.0973226	0.121272	0.394456	0.362665
1.07304	1.04907	0.451273	0.499038	0.980989	0.945889	0.159728	0.183853	0.465825	0.491461	0.185487	0.177732
1.70839	1.61537	0.162087	0.224837	0.218239	0.251921	0.218492	0.20701	0.307641	0.434511	0.158082	0.126306
2.12886	2.08321	0.582546	0.447285	0.110645	0.128958	0.145268	0.113676	0.223399	0.280236	0.107928	0.101158
2.28077	2.27716	1.02562	0.955863	0.137838	0.162979	0.2971	0.278499	0.216633	0.189615	0.102959	0.0738512
1.8817	1.8958	0.17075	0.156597	0.277771	0.26215	0.315693	0.299297	0.918409	1.3376	0.201285	0.190249
0.292599	0.312625	0.529079	0.3826	0.286973	0.199469	0.190269	0.225765	0.580759	0.489918	0.266416	0.318957
Concentrations (U/ml)
0	0	30.296	28.244	0	0	80.825	66.27	0	0	0	0
13.017	11.88	0	0	0	0	0	0	0	0	5.807	4.641
25.463	24.712	7.699	9.271	22.665	21.697	0	0	8.216	9.027	0	0
52.748	46.889	0	0	0	0	0	0	0.945	7.233	0	0
108.281	96.351	11.768	7.699	0	0	0	0	0	0	0	0
198.869	194.955	24.119	22.151	0	0	0	0	0	0	0	0
66.969	68.305	0	0	0	0	2.033	0.268	21.134	34.273	0	0
0	1.725	10.194	5.461	0	0	0	0	11.684	8.966	0	2.313

## Sheet: Plate 2
Plate 2
1	2	3	4	5	6	7	8	9	10	11	12
Dil	Dil	IM 31	IM 31	IM 42	IM 42	IM 52	IM 52	26	26	251	251
Cal 1	Cal 1	IM 32	IM 32	IM 43	IM 43	IM 54	IM 54	74	74	HC036	HC036
Cal 2	Cal 2	IM 33	IM 33	IM 44	IM 44	IM 55	IM 55	135	135	HC039	HC039
Cal 3	Cal 3	IM 34	IM 34	IM 46	IM 46	132	132	186	186	HC045	HC045
Cal 4	Cal 4	IM 37	IM 37	IM 48	IM 48	136	136	191	191	HC054	HC054
Cal 5	Cal 5	IM 38	IM 38	IM 49	IM 49	145	145	196	196	HC057	HC057
PC	PC	IM 40	IM 40	IM 50	IM 50	161	161	203	203	HC058	HC058
NC	NC	IM 41	IM 41	IM 51	IM 51	181	181	232	232	HC062	HC062
Absorbance @ 450 (0.1s) (A)
0
0.056	0.123	0.311	0.341	0.177	0.137	2.242	2.406	0.281	0.303	0.24	0.231
0.653	0.549	0.108	0.11	2.058	1.979	0.249	0.277	0.311	0.294	0.141	0.19
1.068	0.989	0.579	0.44	0.156	0.205	0.463	0.513	0.274	0.323	0.195	0.182
1.576	1.447	0.33	0.316	0.109	0.127	0.228	0.25	0.114	0.214	0.2	0.237
2.115	2.03	0.211	0.23	0.299	0.273	0.555	0.532	0.144	0.22	0.179	0.161
2.315	2.349	0.507	0.45	0.225	0.145	0.379	0.581	0.503	0.564	0.119	0.124
1.918	1.902	0.167	0.171	0.131	0.135	0.118	0.12	0.25	0.294	0.172	0.161
0.315	0.319	0.482	0.352	0.485	0.389	0.252	0.264	0.673	0.681	0.124	0.158
Absorbance @ 560 (0.1s) (A) - reference
0
0.032	0.033	0.036	0.042	0.036	0.033	0.043	0.05	0.037	0.033	0.034	0.037
0.037	0.033	0.036	0.038	0.046	0.044	0.035	0.036	0.038	0.034	0.037	0.036
0.039	0.038	0.037	0.034	0.036	0.034	0.04	0.04	0.039	0.036	0.037	0.035
0.038	0.037	0.038	0.035	0.034	0.036	0.037	0.034	0.037	0.04	0.034	0.036
0.045	0.043	0.041	0.039	0.036	0.034	0.041	0.04	0.037	0.035	0.039	0.037
0.045	0.046	0.038	0.041	0.036	0.035	0.036	0.039	0.036	0.038	0.033	0.036
0.042	0.04	0.036	0.039	0.039	0.033	0.035	0.038	0.034	0.034	0.039	0.036
0.035	0.036	0.037	0.038	0.035	0.035	0.035	0.039	0.038	0.044	0.033	0.038
Adjused Absorbance (450-560nm)
0.024	0.09	0.275	0.299	0.142	0.104	2.199	2.356	0.244	0.27	0.206	0.194
0.617	0.516	0.073	0.072	2.012	1.935	0.214	0.24	0.273	0.26	0.103	0.154
1.029	0.951	0.542	0.405	0.121	0.172	0.422	0.473	0.234	0.287	0.157	0.148
1.538	1.409	0.292	0.281	0.075	0.091	0.191	0.216	0.077	0.174	0.165	0.2
2.07	1.987	0.171	0.191	0.263	0.238	0.514	0.493	0.108	0.185	0.14	0.124
2.27	2.304	0.47	0.41	0.189	0.11	0.343	0.542	0.466	0.525	0.086	0.088
1.876	1.862	0.131	0.132	0.092	0.102	0.083	0.081	0.216	0.26	0.133	0.125
0.28	0.283	0.444	0.314	0.451	0.355	0.216	0.224	0.634	0.637	0.091	0.121
Concentrations (U/ml)
0	0	3.58	4.526	0	0	150.999	264.642	2.579	3.32	1.011	0.586
13.612	10.598	0	0	103.113	90.345	1.391	2.439	3.58	3.021	0	0
27.139	24.286	11.461	7.466	0	0	8.13	9.565	2.333	3.963	0	0
51.801	44.107	4.184	3.741	0	0	0.424	1.431	0	0	0	0.876
114.488	98.246	0	0.533	3.188	2.297	10.77	10.11	0	0	0	0
185.341	207.971	9.393	7.755	0.243	0	5.677	11.519	9.279	11.029	0	0
82.207	80.267	0	0	0	0	0	0	1.431	3.021	0	0
3.709	3.836	8.676	4.864	8.762	5.974	1.511	1.97	14.201	14.438	0	0

## Sheet: Plate 3
Plate 3
1	2	3	4	5	6	7	8	9	10	11	12
Dil	Dil	IM27-1	IM27-1	IM27-2	IM27-2	pt 07	pt 07	IM 56	IM 56	HC014	HC014
Cal 1	Cal 1	IM37-1	IM37-1	IM37-2	IM37-2	IM8	IM8	IM 60	IM 60	HC015	HC015
Cal 2	Cal 2	IM43-1	IM43-1	IM43-2	IM43-2	IM 79	IM 79	IM 59	IM 59	HC017	HC017
Cal 3	Cal 3	IM58-1	IM58-1	IM58-2	IM58-2	IM 101	IM 101	102	102	HC018	HC018
Cal 4	Cal 4	1-055	1-055	IM11	IM11	IM 100	IM 100	100	100	HC019	HC019
Cal 5	Cal 5	1-011a	1-011a	1-011b	1-011b	IM 95	IM 95	HC003	HC003	HC021	HC021
PC	PC	1-019 a	1-019 a	1-019b	1-019b	IM 102	IM 102	HC004	HC004	HC024	HC024
NC	NC	1-102 a	1-102 a	1-102 b	1-102 b	IM 67	IM 67	HC006	HC006	HC026	HC026
Absorbance @ 450 (0.1s) (A)
0.000
0.0811689	0.0749918	0.25325	0.250981	0.307485	0.265358	0.321432	0.328366	0.168636	0.155019	0.205407	0.195406
0.561094	0.55172	0.277678	0.277553	0.574098	0.422674	0.32757	0.339197	0.180247	0.171837	0.184489	0.223132
0.875784	0.899999	1.80814	1.83494	2.21221	2.1872	0.26781	0.334785	0.364712	0.353945	0.257723	0.23996
1.41968	1.26835	0.30968	0.400173	0.210065	0.18954	0.200626	0.225754	0.297019	0.325568	0.22107	0.25929
1.93287	1.83284	0.722461	0.803748	0.795065	0.718732	0.166211	0.159809	0.169186	0.198456	0.188714	0.192703
2.38205	2.36396	0.242802	0.246474	0.181641	0.177545	0.262484	0.267003	0.211661	0.204608	0.221159	0.231362
1.62006	1.55638	0.121276	0.124873	0.180196	0.16973	0.149639	0.158175	0.250175	0.245688	0.202928	0.186659
0.155563	0.128996	0.164147	0.166012	0.206985	0.179557	1.64698	1.60086	0.169512	0.18406	0.175425	0.170997
Absorbance @ 560 (0.1s) (A) - reference
0.000
0.0720551	0.0637436	0.0661883	0.0878551	0.077978	0.0627425	0.064418	0.0799232	0.0684132	0.066015	0.0670962	0.0604668
0.0606311	0.053309	0.0662976	0.069622	0.070806	0.0607816	0.0617336	0.0707098	0.0601467	0.0558983	0.0621783	0.0586117
0.0591338	0.058799	0.0680392	0.0780257	0.0723784	0.0714761	0.0591869	0.0759908	0.0519725	0.0598862	0.058972	0.0584257
0.0641208	0.0520235	0.0677376	0.0706559	0.0632803	0.0548983	0.064394	0.0657059	0.0572855	0.0546861	0.0638068	0.0608732
0.0630589	0.0591175	0.0650327	0.0722611	0.0664946	0.0565699	0.0656996	0.0662131	0.0598499	0.0589576	0.0703807	0.0682344
0.0711445	0.0706559	0.0612756	0.0661902	0.0547319	0.0651271	0.055879	0.0640355	0.0597666	0.0647218	0.0663325	0.0694467
0.0573652	0.0518133	0.0544777	0.0623029	0.0521114	0.0608149	0.0573751	0.0700473	0.0635567	0.0570155	0.0667985	0.0651568
0.0706764	0.046479	0.061236	0.0663923	0.0614288	0.0654446	0.0737935	0.0672987	0.0655702	0.0658188	0.0688903	0.0588058
Adjused Absorbance (450-560nm)
0.00911379	0.0112482	0.187062	0.163125	0.229507	0.202615	0.257014	0.248443	0.100223	0.0890041	0.13831	0.13494
0.500463	0.498411	0.21138	0.207931	0.503292	0.361892	0.265836	0.268487	0.120101	0.115939	0.122311	0.16452
0.81665	0.841201	1.7401	1.75691	2.13983	2.11572	0.208624	0.258794	0.312739	0.294059	0.198751	0.181535
1.35555	1.21632	0.241943	0.329517	0.146785	0.134642	0.136232	0.160048	0.239734	0.270882	0.157263	0.198417
1.86981	1.77372	0.657428	0.731487	0.728571	0.662162	0.100511	0.0935961	0.109337	0.139498	0.118333	0.124468
2.31091	2.2933	0.181527	0.180284	0.126909	0.112418	0.206605	0.202968	0.151894	0.139886	0.154827	0.161916
1.56269	1.50456	0.0667982	0.0625702	0.128084	0.108915	0.0922638	0.0881281	0.186618	0.188672	0.136129	0.121502
0.0848865	0.0825174	0.102911	0.0996201	0.145557	0.114112	1.57318	1.53356	0.103941	0.118241	0.106535	0.112191
Concentrations (U/ml)
0	0	2.96	2.3	4.162	3.404	4.931	4.673	0.598	0.302	1.621	1.54
12.482	12.415	3.627	3.543	12.584	8.047	5.19	5.248	1.135	1.028	1.189	2.355
24.555	25.6	89.969	91.984	155.484	150.111	3.571	4.989	6.567	6.006	3.292	2.822
54.628	45.224	4.502	7.075	1.865	1.54	1.567	2.218	4.445	5.335	2.137	3.265
106.744	94.05	18.092	20.978	20.898	18.281	0.625	0.436	0.84	1.648	1.082	1.243
202.78	196.9	2.822	2.767	1.324	0.92	3.515	3.404	2.001	1.675	2.082	2.273
71.557	66.385	0	0	1.351	0.84	0.383	0.275	2.96	3.015	1.567	1.189
0.193	0.139	0.679	0.598	1.838	0.974	72.487	68.925	0.705	1.082	0.786	0.92

## Sheet: Plate 4
Plate 4
1	2	3	4	5	6	7	8	9	10	11	12
Dil	Dil	267	267	371	371	1-018 a	1-018 a	IM 80	IM 80	HC040	HC040
Cal 1	Cal 1	111	111	143	143	1-018 b	1-018 b	IM 81	IM 81	HC043	HC043
Cal 2	Cal 2	54	54	522	522	IM 57	IM 57	IM 83	IM 83	HC046	HC046
Cal 3	Cal 3	257	257	292	292	IM 61	IM 61	80	80	HC047	HC047
Cal 4	Cal 4	140	140	154	154	IM 70	IM 70	14	14	HC048	HC048
Cal 5	Cal 5	53	53	65	65	IM 68	IM 68	HC029	HC029	HC049	HC049
PC	PC	59	59	148	148	IM 74	IM 74	HC030	HC030	HC050	HC050
NC	NC	1-017 a	1-017 a	1-017 b	1-017 b	IM 76	IM 76	HC033	HC033	HC052	HC052
Absorbance @ 450 (0.1s) (A)
0.000
0.0755244	0.0638958	0.114129	0.118413	0.15999	0.171769	0.221186	0.250247	0.222883	0.216022	0.193844	0.184238
0.553135	0.527255	0.299056	0.278978	0.259249	0.225655	0.0642242	0.0701831	0.230095	0.219772	0.207489	0.201135
0.88689	0.879331	0.143369	0.148729	0.118345	0.110058	0.136227	0.147989	0.161918	0.159955	0.170303	0.179534
1.51037	1.29398	0.598898	0.520448	0.483476	0.510598	0.215485	0.225183	0.200075	0.201104	0.214355	0.207765
1.997	1.80076	0.160314	0.184576	0.150699	0.145051	0.245939	0.255556	0.711715	0.644846	0.522878	0.508657
2.32375	2.35141	0.303584	0.293099	0.228615	0.219177	0.685638	0.676334	0.484944	0.427605	0.170574	0.169746
1.66946	1.69416	0.158702	0.159843	0.16404	0.171323	0.132768	0.145587	0.517565	0.524291	0.2241	0.217408
0.134794	0.137719	0.174643	0.166296	0.150508	0.138185	0.127961	0.131644	0.348645	0.37361	0.238912	0.250619
Absorbance @ 560 (0.1s) (A) - reference
0.000
0.0682566	0.0538788	0.0558701	0.0683491	0.0778011	0.0603338	0.0535425	0.0740067	0.0606121	0.0512622	0.052902	0.0450644
0.0598296	0.0470532	0.0547242	0.0585047	0.0595531	0.0459904	0.0534746	0.0635357	0.0543106	0.0447856	0.0495492	0.0577927
0.054705	0.0471049	0.0503984	0.0577173	0.053943	0.0449924	0.0448835	0.0647564	0.0503678	0.0446217	0.0498787	0.0538887
0.0600412	0.0524415	0.0676801	0.062857	0.0540085	0.0519697	0.0575274	0.0615656	0.0585078	0.050736	0.0665834	0.0564585
0.0628841	0.051493	0.0574303	0.0610048	0.0494783	0.043346	0.0549754	0.0616982	0.0583862	0.0487498	0.0657736	0.0592948
0.0633924	0.0571472	0.0509028	0.0553086	0.0546519	0.054467	0.0505828	0.0607663	0.0587781	0.0562126	0.057609	0.0524242
0.0542846	0.0519298	0.0524445	0.0637681	0.0497662	0.050969	0.0455589	0.0618824	0.0486357	0.0588343	0.0612483	0.0574197
0.0564498	0.0486436	0.0660199	0.0620245	0.0632189	0.0621642	0.0518634	0.0596669	0.0643824	0.0567555	0.0573456	0.0542043
Adjused Absorbance (450-560nm)
0.0072678	0.0100169	0.0582585	0.0500635	0.0821893	0.111435	0.167643	0.17624	0.162271	0.164759	0.140942	0.139173
0.493306	0.480202	0.244332	0.220474	0.199696	0.179664	0.0107495	0.0066474	0.175784	0.174987	0.15794	0.143343
0.832185	0.832226	0.0929702	0.0910116	0.0644018	0.0650652	0.0913435	0.0832323	0.111551	0.115333	0.120424	0.125645
1.45033	1.24154	0.531218	0.457591	0.429467	0.458628	0.157958	0.163618	0.141567	0.150368	0.147771	0.151306
1.93412	1.74927	0.102884	0.123571	0.10122	0.101705	0.190964	0.193858	0.653328	0.596097	0.457105	0.449362
2.26036	2.29426	0.252681	0.237791	0.173963	0.16471	0.635055	0.615568	0.426166	0.371392	0.112965	0.117322
1.61518	1.64223	0.106258	0.0960746	0.114273	0.120354	0.0872087	0.0837044	0.468929	0.465457	0.162852	0.159988
0.0783438	0.0890751	0.108623	0.104272	0.0872892	0.0760204	0.0760977	0.0719772	0.284263	0.316854	0.181566	0.196414
Concentrations U/ml)
0	0	0.425	0.166	1.138	1.953	3.512	3.73	3.349	3.431	2.777	2.723
12.794	12.394	5.585	4.928	4.383	3.839	0	0	3.73	3.703	3.24	2.832
24.612	24.612	1.451	1.394	0.61	0.64	1.394	1.167	1.981	2.064	2.202	2.367
58.349	44.399	13.983	11.724	10.853	11.754	3.24	3.404	2.805	3.023	2.968	3.05
112.84	86.756	1.731	2.312	1.675	1.703	4.138	4.219	18.007	16.085	11.694	11.452
195.05	208.741	5.832	5.42	3.676	3.431	17.392	16.751	10.764	9.153	2.009	2.119
72.449	75.095	1.814	1.535	2.036	2.202	1.281	1.195	12.058	11.936	3.376	3.295
1.023	1.338	1.898	1.759	1.281	0.965	0.965	0.848	6.69	7.614	3.893	4.274

## Sheet: Plate 5
Plate 5
1	2	3	4	5	6	7	8	9	10	11	12
Dil	Dil	1-040 a	1-040 a	1-040 c	1-040 c	IM 85	IM 85	IM 94	IM 94	HC058	HC058
Cal 1	Cal 1	1-049 a	1-049 a	1-049 b	1-049 b	IM 86	IM 86	55	55	HC061	HC061
Cal 2	Cal 2	MEL 69	MEL 69	IM65	IM65	IM 89	IM 89	53	53	HC062	HC062
Cal 3	Cal 3	MEL 70	MEL 70	IM72	IM72	IM 90	IM 90	24	24	HC065	HC065
Cal 4	Cal 4	MEL 71	MEL 71	IM 69	IM 69	IM 96	IM 96	HC053	HC053	HC070	HC070
Cal 5	Cal 5	MEL 75	MEL 75	IM91	IM91	IM 92	IM 92	HC054	HC054	HC072	HC072
PC	PC	MEL 78	MEL 78	IM77	IM77	IM 93	IM 93	HC056	HC056	HC076	HC076
NC	NC	MEL 79	MEL 79	IM87	IM87	IM 98	IM 98	HC057	HC057	HC077	HC077
Absorbance @ 450 (0.1s) (A)
0.000
0.0797752	0.067079	0.246217	0.253024	0.332668	0.293014	0.141824	0.139504	0.407176	0.369383	0.197943	0.16332
0.679539	0.595809	0.340804	0.332133	0.2669	0.278527	0.332923	0.341401	0.373198	0.33723	0.164479	0.149723
0.99192	0.962305	0.170878	0.196903	0.243386	0.238144	0.245313	0.237599	0.262465	0.291114	0.137141	0.163714
1.57838	1.36546	0.188659	0.186408	0.19696	0.179942	0.341997	0.364903	0.243814	0.229839	0.15055	0.152948
2.1319	2.08255	0.243524	0.252846	0.223702	0.221439	0.764572	0.726729	0.140093	0.130716	0.260311	0.256283
2.45422	2.42714	0.312005	0.309763	0.299372	0.271478	0.18343	0.19549	0.215437	0.200112	0.968696	0.932518
1.84948	1.8261	0.173466	0.187626	0.279679	0.270127	0.305657	0.364694	0.138771	0.135513	0.19166	0.185257
0.15542	0.167625	0.154296	0.147963	0.232779	0.20527	0.201889	0.191473	0.200193	0.207281	0.314096	0.257549
Absorbance @ 560 (0.1s) (A) - reference
0.000
0.0742087	0.0539634	0.0657758	0.0822934	0.0755186	0.0666787	0.0615464	0.0734819	0.0729273	0.0548234	0.0585672	0.0553653
0.0662197	0.0457983	0.0630967	0.0679794	0.060843	0.0530114	0.0728479	0.0731067	0.064295	0.0477911	0.0544925	0.0500704
0.0561773	0.0487275	0.0560792	0.0711526	0.0551039	0.0557491	0.0521057	0.0629832	0.0523887	0.0504997	0.0516367	0.0639839
0.0631585	0.054087	0.0674133	0.0640914	0.0591613	0.0536899	0.0639397	0.0683444	0.0653818	0.0584168	0.066727	0.0570044
0.0604622	0.0543064	0.066146	0.0675586	0.0511215	0.0492496	0.0653793	0.0736797	0.0598852	0.0532345	0.0648203	0.0558167
0.0730331	0.0581043	0.0645892	0.0647754	0.0522312	0.0558186	0.0554626	0.0658837	0.0617394	0.0550376	0.0570386	0.0577826
0.0623782	0.050534	0.055413	0.0616709	0.0528271	0.0571767	0.0591838	0.0659809	0.0579559	0.0591563	0.0605757	0.055849
0.057648	0.0488349	0.0676523	0.0636888	0.0603945	0.0633844	0.0721047	0.0627064	0.0723772	0.0581922	0.0622692	0.058827
Adjused Absorbance (450-560nm)
0.00556651	0.0131156	0.180442	0.170731	0.257149	0.226336	0.0802781	0.0660225	0.334248	0.31456	0.139375	0.107954
0.613319	0.550011	0.277707	0.264154	0.206057	0.225516	0.260075	0.268294	0.308903	0.289439	0.109987	0.0996525
0.935743	0.913578	0.114799	0.12575	0.188282	0.182395	0.193207	0.174616	0.210076	0.240614	0.0855041	0.0997301
1.51522	1.31137	0.121246	0.122316	0.137799	0.126252	0.278057	0.296558	0.178433	0.171422	0.0838232	0.0959441
2.07144	2.02825	0.177378	0.185288	0.172581	0.172189	0.699193	0.653049	0.0802075	0.0774816	0.195491	0.200466
2.38119	2.36904	0.247416	0.244987	0.247141	0.21566	0.127968	0.129606	0.153698	0.145075	0.911657	0.874735
1.78711	1.77556	0.118053	0.125955	0.226852	0.21295	0.246473	0.298713	0.0808154	0.0763569	0.131084	0.129408
0.0977718	0.118791	0.0866441	0.0842746	0.172384	0.141886	0.129784	0.128767	0.127816	0.149088	0.251826	0.198722
Concentrations (U/ml)
0	0	0	0	0	0	0	0	0	0	0	0
13.364	10.671	0	0	0	0	0	0	0	0	0	0
26.423	25.524	0	0	0	0	0	0	0	0	0	0
54.448	43.22	0	0	0	0	0	0	0	0	0	0
106.922	100.506	0	0	0	0	16.883	15.016	0	0	0	0
203.498	195.775	0	0	0	0	0	0	0	0	25.442	23.943
74.054	73.107	0	0	0	0	0	0	0	0	0	0
0	0	0	0	0	0	0	0	0	0	0	0

## Sheet: Plate 6
Plate 6
1	2	3	4	5	6	7	8	9	10	11	12
Dil	Dil	CGLU486- P6	CGLU486- P6	CGLU318P7	CGLU318P7	CGLU494P4	CGLU494P4	IM 107	IM 107	47	47
Cal 1	Cal 1	CGLU542P4	CGLU542P4	CGLU325P8	CGLU325P8	CGLU502P7	CGLU502P7	IM 108	IM 108	52	52
Cal 2	Cal 2	CGLU628- P3	CGLU628- P3	CGLU338P5	CGLU338P5	CGLU503P9	CGLU503P9	IM 109	IM 109	164	164
Cal 3	Cal 3	CGLU271P5	CGLU271P5	CGLU339P9	CGLU339P9	CGLU528	CGLU528	IM 110	IM 110	169	169
Cal 4	Cal 4	CGLU284P5	CGLU284P5	CGLU368P10	CGLU368P10	CGLU532P8	CGLU532P8	210	210	HC044	HC044
Cal 5	Cal 5	CGLU306P6	CGLU306P6	CGLU370P25	CGLU370P25	CGLU567P7	CGLU567P7	235	235	HC069	HC069
PC	PC	CGLU307	CGLU307	CGLU373P7	CGLU373P7	CGLU859	CGLU859	240	240	HC071	HC071
NC	NC	CGLU310	CGLU310	CGLU435P14	CGLU435P14	CGLU892	CGLU892	31	31	HC074	HC074
Absorbance @ 450 (0.1s) (A)
0.000
0.0648323	0.0547094	0.279352	0.256099	0.391389	0.377314	0.271509	0.280072	0.243997	0.22576	0.469912	0.397382
0.799136	0.751476	0.318789	0.3244	0.494225	0.444192	0.185267	0.190093	0.377903	0.401865	0.230356	0.270632
1.12303	0.963766	0.265848	0.219903	0.281757	0.288973	0.344707	0.314738	0.218266	0.209208	0.475831	0.517085
1.28739	1.15951	0.271013	0.261847	0.363705	0.36125	0.193602	0.193342	0.309894	0.284399	1.97262	1.97503
1.87627	1.74822	0.972268	0.961418	0.272557	0.250844	0.25717	0.247797	0.900486	0.880819	0.207224	0.188272
2.21083	2.18759	0.404888	0.33696	0.204396	0.181541	0.705196	0.73313	0.760674	0.71083	0.31967	0.329473
1.68259	1.61812	0.194201	0.19081	0.352756	0.35105	0.188684	0.191884	0.492035	0.443205	0.350077	0.348765
0.203335	0.22906	0.288301	0.3013	1.32851	1.10109	0.339954	0.370149	0.760731	0.798454	0.2829	0.285609
Absorbance @ 560 (0.1s) (A)
0.000
0.0438683	0.0393358	0.0411467	0.0456891	0.0418875	0.0390811	0.0394481	0.0431103	0.0390554	0.0416414	0.0455099	0.0439823
0.0473966	0.0431657	0.0397837	0.044284	0.048016	0.0432259	0.0409646	0.0395931	0.0442417	0.0494113	0.0466707	0.0401148
0.0433674	0.0449134	0.0470417	0.0401291	0.0430723	0.0437477	0.0427023	0.0462945	0.0388217	0.0415191	0.0409814	0.0411144
0.0471292	0.0481615	0.0447134	0.0458	0.0397156	0.0392947	0.0392774	0.0388909	0.0399916	0.0441029	0.0496074	0.0488393
0.0531361	0.0440541	0.0511335	0.0471918	0.0432849	0.0392929	0.0394922	0.0457691	0.048998	0.0441367	0.0411527	0.0377619
0.0576095	0.0511985	0.0516913	0.0464255	0.046519	0.0419109	0.0388283	0.0459163	0.0455535	0.0460987	0.0433758	0.042659
0.0500182	0.0538828	0.0423524	0.0461933	0.0457642	0.0471924	0.0437917	0.0464164	0.0436446	0.0484198	0.041723	0.039746
0.0468747	0.0475128	0.041079	0.0494339	0.0495451	0.0567346	0.0393335	0.0481804	0.040409	0.0481384	0.0462685	0.0493588
Absorbance (450-560nm)
0.0648323	0.0547094	0.279352	0.256099	0.391389	0.377314	0.271509	0.280072	0.243997	0.22576	0.469912	0.397382
0.799136	0.751476	0.318789	0.3244	0.494225	0.444192	0.185267	0.190093	0.377903	0.401865	0.230356	0.270632
1.12303	0.963766	0.265848	0.219903	0.281757	0.288973	0.344707	0.314738	0.218266	0.209208	0.475831	0.517085
1.28739	1.15951	0.271013	0.261847	0.363705	0.36125	0.193602	0.193342	0.309894	0.284399	1.97262	1.97503
1.87627	1.74822	0.972268	0.961418	0.272557	0.250844	0.25717	0.247797	0.900486	0.880819	0.207224	0.188272
2.21083	2.18759	0.404888	0.33696	0.204396	0.181541	0.705196	0.73313	0.760674	0.71083	0.31967	0.329473
1.68259	1.61812	0.194201	0.19081	0.352756	0.35105	0.188684	0.191884	0.492035	0.443205	0.350077	0.348765
0.203335	0.22906	0.288301	0.3013	1.32851	1.10109	0.339954	0.370149	0.760731	0.798454	0.2829	0.285609
Units
0	0	0	0	0	0	0	0	0	0	0	0
11.188	6.559	0	0	0	0	0	0	0	0	0	0
37.067	24.938	0	0	0	0	0	0	0	0	0	0
49.584	39.428	0	0	0	0	0	0	0	0	133.116	133.735
114.68	96.933	25.091	24.557	0	0	0	0	19.663	18.542	0	0
199.552	192.728	0	0	0	0	0	3.733	7.374	0	0	0
87.881	79.913	0	0	0	0	0	0	0	0	0	0
0	0	0	0	52.803	34.348	0	0	7.933	10.996	0	0

## Sheet: Plate 7
Plate 7
1	2	3	4	5	6	7	8	9	10	11	12
Dil	Dil	CGLU248P5	CGLU248P5	CGLU434P6	CGLU434P6	CGLU357P10	CGLU357P10	IM 103	IM 103	139	139
Cal 1	Cal 1	CGLU252 P8	CGLU252 P8	CGLU473 P11	CGLU473 P11	CGLU369P12	CGLU369P12	IM 104	IM 104	145	145
Cal 2	Cal 2	CGLU257 P1	CGLU257 P1	CGLU476 P9	CGLU476 P9	CGLU379P7	CGLU379P7	IM 105	IM 105	153	153
Cal 3	Cal 3	CGLU293P6	CGLU293P6	CGLU527 p5	CGLU527 p5	CGLU389P12	CGLU389P12	IM 106	IM 106	156	156
Cal 4	Cal 4	CGLU493 P15	CGLU493 P15	CGHN6	CGHN6	CGLU458P17	CGLU458P17	22	22	199	199
Cal 5	Cal 5	CGLU560 P5	CGLU560 P5	CGLU262P6	CGLU262P6	CGLU470P5	CGLU470P5	65	65	HC002	HC002
PC	PC	CGLU324 P10	CGLU324 P10	CGLU336P14	CGLU336P14	CGLU471P6	CGLU471P6	126	126	HC022	HC022
NC	NC	CGLU359- P5	CGLU359- P5	CGLU347P19	CGLU347P19	CGLU475P6	CGLU475P6	127	127	HC027	HC027
Absorbance @ 450 (0.1s) (A)
0.000
0.0771152	0.0683973	0.258641	0.239419	0.535196	0.49273	0.472919	0.389778	0.20556	0.205762	0.290369	0.258206
1.02937	0.891999	0.40712	0.395911	0.517216	0.474264	0.285623	0.263531	0.305458	0.310738	0.397398	0.406568
1.38552	1.32596	0.804348	0.701494	0.55962	0.550458	0.28106	0.293539	0.415771	0.385171	0.236662	0.234473
1.60118	1.42107	0.590284	0.524681	0.221717	0.216568	0.549846	0.481667	0.601508	0.682505	0.465331	0.488503
2.10772	2.09203	0.944795	0.869511	0.792335	0.775934	0.363718	0.339623	0.447472	0.425765	0.444547	0.42537
2.31631	2.31139	0.610693	0.448508	0.805511	0.743367	0.485099	0.466991	0.512616	0.546869	0.446206	0.375528
1.93147	1.881	0.866995	0.814572	0.540552	0.543812	0.256414	0.228066	0.395601	0.447751	0.401685	0.397026
0.231031	0.318884	0.286423	0.305629	0.4044	0.502763	0.532136	0.585194	0.479058	0.449551	0.43587	0.47152
Absorbance @ 560 (0.1s) (A) - reference
0.000
0.058091	0.0448123	0.0418449	0.0464262	0.0521291	0.0491437	0.0474467	0.0479701	0.043748	0.0423489	0.0448462	0.0476231
0.0587908	0.0478416	0.0574694	0.0431123	0.0436648	0.045723	0.0480395	0.0470413	0.046774	0.0461	0.0449181	0.0489569
0.0643198	0.0482722	0.0525891	0.055093	0.0493752	0.0413973	0.0438101	0.0436835	0.0410663	0.0426531	0.0430238	0.046143
0.0562308	0.0486294	0.054702	0.0484684	0.0424908	0.0413721	0.042162	0.0474206	0.043909	0.0410226	0.0474127	0.0477138
0.0601106	0.0559232	0.0501009	0.0472753	0.0461703	0.0432153	0.0457678	0.0446045	0.0458484	0.0428468	0.0473227	0.0535786
0.0617906	0.0533264	0.0510411	0.0457987	0.0447779	0.0479226	0.0473592	0.0512908	0.0452254	0.0459721	0.0496709	0.0462679
0.0558673	0.0504571	0.0496196	0.050331	0.0508768	0.0451147	0.0439434	0.0585118	0.0506881	0.0473665	0.0486538	0.0443351
0.0498372	0.0474321	0.0448383	0.0453398	0.0509773	0.04925	0.0488984	0.0563432	0.0484014	0.0546939	0.0472181	0.0515332
Absorbance (450-560nm)
0.0190242	0.023585	0.216796	0.192992	0.483066	0.443587	0.425472	0.341808	0.161812	0.163413	0.245523	0.210583
0.970578	0.844158	0.34965	0.352799	0.473551	0.428541	0.237583	0.21649	0.258684	0.264638	0.35248	0.357611
1.3212	1.27769	0.751759	0.646401	0.510245	0.509061	0.23725	0.249856	0.374704	0.342518	0.193638	0.18833
1.54495	1.37244	0.535582	0.476213	0.179227	0.175196	0.507684	0.434246	0.557599	0.641482	0.417918	0.440789
2.0476	2.0361	0.894694	0.822236	0.746165	0.732718	0.31795	0.295018	0.401623	0.382919	0.397224	0.371791
2.25452	2.25806	0.559652	0.402709	0.760733	0.695444	0.43774	0.4157	0.46739	0.500897	0.396535	0.32926
1.87561	1.83054	0.817376	0.764241	0.489675	0.498697	0.21247	0.169554	0.344913	0.400385	0.353031	0.35269
0.181194	0.271452	0.241585	0.260289	0.353423	0.453513	0.483238	0.52885	0.430656	0.394857	0.388652	0.419986
Concentrations (U/ml)
0	0	0	0	0	0	0	0	0	0	0	0
13.924	9.039	0	0	0	0	0	0	0	0	0	0
31.499	28.922	5.86	2.516	0	0	0	0	0	0	0	0
47.693	34.75	0	0	0	0	0	0	0	2.366	0	0
119.366	116.51	10.926	8.253	5.662	5.237	0	0	0	0	0	0
190.843	192.339	0.023	0	6.159	4.022	0	0	0	0	0	0
85.853	79.116	8.077	6.259	0	0	0	0	0	0	0	0
0	0	0	0	0	0	0	0	0	0	0	0

## Sheet: Summary
ICI IA				RA				Healthy Control				ICI No IA
ID	Absorbance	Units/ml		ID	Absorbance	Units/ml		ID	Absorbance	Units/ml	1.66775	ID					Cut off
IM 52	2.27747	207.82		169		133.425		HC072	0.893196	24.6925		292	3	0.444048	11.3035		Avg + 3SD	15.24
IM 43	1.97361	96.729		116	1.128	27.7035		HC030	0.467193	11.997		CGLU493 P15	3	0.858465	9.5895
IM 25	1.93219	73.5475		210		19.1025		HC048	0.453233	11.573		CGHN6	3	0.739442	5.4495
IM 67	1.55337	70.706		14	0.624712	17.046		HC029	0.398779	9.9585		CGLU262P6	3	0.728089	5.0905
IM 1	1.19422	29.27		232	0.635816	14.3195		HC033	0.300559	7.152		CGLU257 P1	3	0.69908	4.188
IM 6	0.990741	23.135		136	0.503301	10.44		HC005	0.378561	5.224		143	3	0.18968	4.111
IM 11	0.963439	22.181		126	0.535339	10.325		HC052	0.18899	4.0835		65	3	0.169336	3.5535
IM 68	0.625311	17.0715		196	0.495768	10.154		HC050	0.16142	3.3355		148	3	0.117314	2.119
IM 96	0.676121	15.9495		31		9.4645		HC017	0.190143	3.057		154	3	0.101463	1.689
IM 5	0.514915	9.7335		72	0.478643	8.6215		HC043	0.150641	3.036		371	3	0.0968122	1.5455
IM 33	0.473423	9.4635		145	0.442542	8.598		HC047	0.149539	3.009		522	3	0.0647335	0.625
IM 55	0.447909	8.8475		102	0.255308	4.89		HC004	0.187645	2.9875		CGLU560 P5	3	0.858465	0.0115
IM 38	0.439606	8.574		82	0.371076	4.089		HC040	0.140058	2.75		CGLU248P5	3	0.204894	0
IM 3	0.475155	8.485		235		3.687		HC018	0.17784	2.701		CGLU293P6	3	0.505897	0
IM 8	0.45584	7.8275		74	0.266333	3.3005		HC046	0.123034	2.2845		CGLU359- P5	3	0.250937	0
IM 51	0.402709	7.368		135	0.260919	3.148		HC021	0.158371	2.1775		CGLU527 p5	3	0.177211	0
IM 41	0.379039	6.77		26	0.257046	2.9495		HC049	0.115144	2.064		CGLU336P14	3	0.494186	0
IM 59	0.303399	6.2865		80	0.145967	2.914		HC003	0.14589	1.838		CGLU347P19	3	0.403468	0
IM 79	0.233709	4.28		203	0.238129	2.226		HC015	0.143416	1.772		CGLU357P10	3	0.38364	0
IM 70	0.192411	4.1785		181	0.220159	1.7405		HC024	0.128816	1.378		CGLU389P12	3	0.470965	0
IM 31	0.287197	4.053		100	0.124417	1.244		HC019	0.121401	1.1625		CGLU458P17	3	0.306484	0
IM 34	0.28615	3.9625		54	0.307495	1.1505		HC035	0.292686	1.1565		CGLU470P5	3	0.42672	0
IM 81	0.175386	3.7165		132	0.203546	0.9275		HC006	0.111091	0.8935		CGLU471P6	3	0.191012	0
IM 95	0.204786	3.4595		251	0.199665	0.7985		HC026	0.109363	0.853		CGLU475P6	3	0.506044	0
IM 80	0.163515	3.39		13	0.212751	0		HC014	0.136625	0.79025		CGLU486- P6	3	0.267726	0
IM 61	0.160788	3.322		15	0.129472	0		HC045	0.182812	0.438		CGLU628- P3	3	0.242876	0
IM 48	0.250596	2.7425		29	0.287799	0		HC002		0		CGLU271P5	3	0.26643	0
IM 83	0.113442	2.0225		57	0.208017	0		HC011	0.18161	0		CGLU307	3	0.192505	0
IM 54	0.227111	1.915		59	0.187141	0		HC012	0.142194	0		CGLU310	3	0.294801	0
IM 101	0.14814	1.8925		71	0.109297	0		HC022		0		CGLU368P10	3	0.261701	0
IM58-2	0.140713	1.7025		90	0.251818	0		HC025	0.0884052	0		CGLU370P25	3	0.192968	0
IM 57	0.0872879	1.2805		96	0.203124	0		HC027		0		CGLU502P7	3	0.18768	0
IM 74	0.0854566	1.238		131	0.292802	0		HC031	0.195767	0		CGLU503P9	3	0.329722	0
IM 106		1.183		161	0.0823193	0		HC036	0.128589	0		CGLU528	3	0.193472	0
IM 60	0.11802	1.0815		186	0.125635	0		HC039	0.15241	0		CGLU892	3	0.355051	0
IM 76	0.0740375	0.9065		191	0.14659	0		HC044		0
IM 100	0.0970536	0.5305		55	0.299171	0		HC053	0.0788445	0
IM 56	0.0946137	0.45		53	0.225345	0		HC054	0.149386	0
IM 102	0.0901959	0.329		24	0.174927	0		HC056	0.0785862	0
IM 37	0.18106	0.2665		22		0		HC057	0.138452	0
IM 49	0.149602	0.1215		65		0		HC058	0.123665	0
IM 40	0.131291	0		126		0		HC061	0.10482	0
IM 12	0.23508	0		127		0		HC062	0.0926171	0
IM 4	0.193462	0		139		0		HC065	0.0898837	0
IM 32	0.0722211	0		145		0		HC069		0
IM 24	0.243221	0		153		0		HC070	0.197978	0
IM 50	0.0970579	0		156		0		HC071		0
IM 9	0.236273	0		199		0		HC074		0
IM 23	0.269961	0		240		0		HC076	0.130246	0
IM 10	0.264595	0		47		0		HC077	0.225274	0
IM 7	0.163674	0		52		0
IM 44	0.146201	0		164		0
IM 27	0.139513	0
IM 13	0.119802	0
IM 29	0.17179	0
IM 42	0.122579	0
IM 46	0.0831879	0
IM 2	0.182851	0
IM 19	0.150409	0
IM65	0.185339	0
IM72	0.132026	0
IM 69	0.172385	0
IM91	0.2314	0
IM77	0.219901	0
IM87	0.157135	0
IM 85	0.0731503	0
IM 86	0.264185	0
IM 89	0.183912	0
IM 90	0.287308	0
IM 93	0.272593	0
IM 98	0.129275	0
IM 94	0.324404	0
IM 103	0.162613	0
IM 104	0.261661	0
IM 105	0.358611	0
IM 107	0.234879	0
IM 108	0.389884	0
IM 109	0.213737	0
IM 110	0.297146	0
